# Supplementary material for: LungPath: artificial intelligence-driven histologic pattern recognition for improved diagnosis of early-stage invasive lung adenocarcinoma
Source: PubMed Central journal article supplement — Transl Lung Cancer Res. 2024 Aug 26;13(8):1816–27. doi: 10.21037/tlcr-24-258 (PMC11384487; doi:10.21037/tlcr-24-258), 2024-08-26
Supplement: tlcr-13-08-1816-dss.pdf [file tlcr-13-08-1816-dss.pdf]

## Data Sharing Statement

|                     |                                                                                                                                                     |                                                                                |
|---------------------|-----------------------------------------------------------------------------------------------------------------------------------------------------|--------------------------------------------------------------------------------|
| <b>Article Info</b> | <a href="https://dx.doi.org/10.21037/tlcr-24-258">https://dx.doi.org/10.21037/tlcr-24-258</a>                                                       |                                                                                |
| <b>Item</b>         | <b>Question</b>                                                                                                                                     | <b>Authors' Response<br/>(place "-" if not applicable)</b>                     |
| 1                   | Would you like to share data collected for your study to others?                                                                                    | Yes                                                                            |
| 2                   | If not, would you like to share the reason for your decision?                                                                                       | -                                                                              |
| 3                   | What data in particular will be shared?                                                                                                             | Patients' data without sensitive information                                   |
| 4                   | Any other documents will be shared? Such as study protocol, statistical analysis plan, informed consent form, clinical study report, analytic code. | Statistical analysis plan                                                      |
| 5                   | When will data availability begin?                                                                                                                  | After publication                                                              |
| 6                   | When will data availability end?                                                                                                                    | Within 3 years after publication                                               |
| 7                   | To whom will you share the data?                                                                                                                    | Researchers without commercial aims                                            |
| 8                   | For what type of analysis or purpose?                                                                                                               | Research                                                                       |
| 9                   | How or where can the data/documents be obtained?                                                                                                    | Send email to <a href="mailto:hengrui_liang@163.com">hengrui_liang@163.com</a> |
| 10                  | Any other restrictions?                                                                                                                             | None declare                                                                   |
